# Supplementary material for: PD-L2 suppresses T cell signaling via coinhibitory microcluster formation and SHP2 phosphatase recruitment
Source: PubMed Central journal article supplement (PMC8121797; doi:10.1038/s42003-021-02111-3), 2021-05-14
Supplement: 42003_2021_2111_MOESM3_ESM.pdf [file 42003_2021_2111_MOESM3_ESM.pdf]

## **Description of Additional Supplementary Files**

### **File name: Supplementary Movie 1**

#### **Description: PD-1 forms microclusters in the presence of PD-L1 or PD-L2.**

AND-Tg *Pdcd1*<sup>-/-</sup> CD4<sup>+</sup> T cells were introduced by mPD-1–EGFP in the equal level of endogenous PD-1, plated onto an MCC<sub>88-103</sub>-prepulsed planar bilayer containing I-E<sup>k</sup>–GPI and ICAM-1–GPI without (left) or with mPD-L1–GPI (middle) or mPD-L2–GPI (right) and imaged by TIRF microscopy at every 2.5 s. Bars, 5 μm. A representative of three independent experiments is shown.

### **File name: Supplementary Data 1**

**Description:** Source data for figures and graphs
